# Supplementary material
Source: PubMed Central journal article supplement (PMC2662088)
Supplement: M804265200_1.pdf [file M804265200_1.pdf]

## Supplementary Information

| Primer | Sequence (5'-3')                                             | Restriction sites            | Amino acid coverage |
|--------|--------------------------------------------------------------|------------------------------|---------------------|
| Fw1    | <b>GGGATCC</b> AAAAAAAT <u>G</u> TCACAAAAACAAAAACCAAT        | <i>Bam</i> HI                | 1-524               |
| Rv1    | <u>GTTATCTAGATGGTACCTTCTCTTTGAGATAAGGTTGAG</u>               | <i>Kpn</i> I, <i>Xba</i> I   |                     |
| Fw2    | <b>GGGTACCAAGTAGTTTCTTTACACTC</b>                            | <i>Kpn</i> I                 | 522-868             |
| Rv2    | <b>GGATATCTACCATTGAAATATCTG</b>                              | <i>Eco</i> RV                |                     |
| Fw3    | <b>GGGATCC</b> AAAAAT <u>G</u> GATATCCAATACCAAGATTTAATTTAAG  | <i>Bam</i> HI, <i>Eco</i> RV | 867-1160            |
| Rv3    | <u>GTTATCTAGAACCTAGGATTTGACAATACTTGTA</u> AAAAG              | <i>Avr</i> II, <i>Xba</i> I  |                     |
| Fw4    | <b>GCCTAGGTCAAATTTAAAAGAAATTTGC</b>                          | <i>Avr</i> II                | 1159-1411           |
| Rv4    | <b>GTGGTACCGCATT</b> TTTTACCCGCTGTATCTGAT                    | <i>Kpn</i> I                 |                     |
| Fw5    | <b>GAGATCT</b> AAAAAT <u>G</u> GCGGTACCACCACATTGGAGAAT       | <i>Bgl</i> II, <i>Kpn</i> I  | 1408-1615           |
| Rv5    | <u>GTTATCTAGAAAGTCGCGAGATTTAAAATACTCTTGATAC</u>              | <i>Nru</i> I, <i>Xba</i> I   |                     |
| Fw6    | <b>GAGATCT</b> AAAAAT <u>G</u> GCTCGCGACTGGTATGAGAGATCCATT   | <i>Bgl</i> II, <i>Nru</i> I  | 1613-2008           |
| Rv6    | <u>GTTATCTAGAACTCGAGGTCAAACCACCACCATTCTC</u>                 | <i>Xho</i> I, <i>Xba</i> I   |                     |
| Fw7    | <b>GAGATCT</b> AAAAAT <u>G</u> ACCTCGAGTAATTTCTTTGGTAATGGTTC | <i>Bgl</i> II, <i>Xho</i> I  | 2005-2334           |
| Rv7    | <u>GTTATCTAGAAAGTCGACGTTTGAGTACGACCTAAATAAG</u>              | <i>Sal</i> I, <i>Xba</i> I   |                     |
| Fw8    | <b>GAGATCT</b> AAAAAT <u>G</u> ACGTCGACTTCACCATTGAATGAAGG    | <i>Bgl</i> II, <i>Sal</i> I  | 2331-2631           |
| Rv8A   | <b>GTCTAGATTA</b> AGCATAAAAGTTGTGATTC                        | <i>Xba</i> I                 |                     |
| Rv8B   | <b>GTCTAGA</b> AGCATAAAAGTTGTGATTCTCT                        | <i>Xba</i> I                 |                     |

### SI Table I: Cloning of *gbc* cDNA in *Dictyostelium* expression vectors.

*gbc* cDNA was amplified with PCR from cDNA in eight parts of approximately equal size. Part 8 was amplified in two versions that differ in the presence of a Stop codon, to discriminate for expression of GbpC, and a GbpC-GFP fusion construct. Sequences in red represent restriction sites for direct cloning of separate parts in MB74-expression plasmids, sequences in bold represent restriction sites for fusion of parts, and Start/Stop codons are underlined.
